# Supplementary material for: Strategic Network Design for Parcel Delivery with Drones Under Competition
Source: Atypon-hosted journal article supplement (doi:10.1287/trsc.2019.0928), 2020-01-01
Supplement: trsc.2019.0928.sm1.pdf [file trsc.2019.0928.sm1.pdf]

# Online Appendix

## Appendix A: Proof of Lemma 1

1. Recall equation (2.1) and (2.4). Equation (2.1) says that the utility  $U_{ip}$  increases as the number of services offered increases. Taking the derivative of  $D_{isp}$  with respect to  $U_{ip}$ :

$$\frac{\partial D_{isp}}{\partial U_{ip}} = - \frac{N_{ip}(1 - (\exp(-\lambda U_{ip})(\lambda U_{ip} + 1))) \times (\sum_{j \in J} a_{sp} y_{ijs}) \exp(\beta_{0s} - \beta_{dt} DT_s - \beta_{dc} q_s)}{U_{ip}^2} < 0 \quad (\text{A.1})$$

as  $\lambda > 0$ ,  $U_{ip} > 0$ , and  $\exp(-\lambda U_{ip}) \times (\lambda U_{ip} + 1) > 1$ . Hence, as the number of services offered increases, utility  $U_{ip}$  increases which results in decreasing  $D_{isp}$ . Therefore, maximum demand that may be captured by service  $s \in S$ ,  $D_{isp}^{max}$  is achieved when only service  $s \in S$  is available i.e.,  $y_{ijs} = 1$  and  $y_{ijs'} = 0 \forall s' \neq s$ .

2. Using equation (2.4), total demand captured  $TD_{ip}$ , by the e-retailer is expressed as:

$$TD_{ip} = \frac{N_{ip}(1 - \exp(-\lambda U_{ip}))(U_{ip} - US_{ip})}{U_{ip}}, \quad (\text{A.2})$$

where  $US_{ip} = \exp(\beta_{0,n+1} - \beta_{tt} TT_i - \beta_{tc} TC_i)$  and  $(U_{ip} - US_{ip}) \geq 0$ , is the utility derived by customer zone  $i \in I$  for package  $p \in P$  given the services offered by the e-retailer. Taking the derivative of  $TD_{ip}$  with respect to total utility  $U_{ip}$ :

$$\frac{\partial TD_{ip}}{\partial U_{ip}} = \frac{N_{ip} e^{-\lambda U_{ip}} (US_{ip} (e^{\lambda U_{ip}} - 1) + \lambda U_{ip} (U_{ip} - US_{ip}))}{U_{ip}^2} > 0 \quad (\text{A.3})$$

as  $\lambda > 0$ ,  $U_{ip} > 0$ ,  $(e^{\lambda U_{ip}} - 1) > 0$ , and  $\lambda U_{ip} (U_{ip} - US_{ip}) \geq 0$ . Hence, as  $U_{ip}$  increases,  $TD_{ip}$  increases. Therefore, maximum total demand  $TD_{ip}^{max}$ , is achieved when the e-retailer offers all services in  $S$  to customer zone  $i \in I$  for package  $p \in P$ .  $\square$

## Appendix B: Linear formulation of model NP

Three sets of binary decision variables and one set of continuous nonnegative decision variables are defined as:

$$\begin{aligned} t_{ie} &= \begin{cases} 1, & \text{if customer zone } i \in I \text{ is offered set of services } e \in \mathcal{P}(S) \\ 0, & \text{otherwise} \end{cases} \\ w_j &= \begin{cases} 1, & \text{if candidate facility } j \in J \text{ is opened} \\ 0, & \text{otherwise} \end{cases} \\ x_{js} &= \begin{cases} 1, & \text{if service } s \in S \text{ is offered at facility } j \in J \\ 0, & \text{otherwise} \end{cases} \\ d_{ijspe} &= \text{demand captured by facility } j \in J \text{ using service } s \in S \text{ for package } p \in P \text{ in} \\ & \quad \text{customer zone } i \in I \text{ when set of services offered is } e \in \mathcal{P}(S) \end{aligned}$$

The model NP is transformed into mixed integer program [IP] as:

$$[\text{IP}]: \max \sum_{i \in I} \sum_{j \in J} \sum_{s \in S} \sum_{p \in P} \sum_{e \in \mathcal{P}(S)} (\alpha\pi_p + q_s - c_{ijs}) d_{ijspe} - \sum_{j \in J} \sum_{s \in S} F_s x_{js} - \sum_{j \in J} L_j w_j \quad (\text{B.1})$$

$$\text{s.t.} \quad \sum_{e \in \mathcal{P}(S)} t_{ie} = 1 \quad i \in I, \quad (\text{B.2})$$

$$x_{js} \leq w_j \quad j \in J, s \in S \quad (\text{B.3})$$

$$d_{ijspe} \leq M t_{ie} \quad i \in I, j \in J, s \in S, p \in P, e \in \mathcal{P}(S) \quad (\text{B.4})$$

$$d_{ijspe} \leq M r_{ijs} x_{ijs} \quad i \in I, j \in J, s \in S, p \in P, e \in \mathcal{P}(S) \quad (\text{B.5})$$

$$\sum_{j \in J} d_{ijspe} \leq \bar{D}_{ispe} \quad i \in I, s \in S, p \in P, e \in \mathcal{P}(S) \quad (\text{B.6})$$

$$t_{ie} \in \{0, 1\} \quad i \in I, e \in \mathcal{P}(S) \quad (\text{B.7})$$

$$x_{js} \in \{0, 1\} \quad j \in J, s \in S \quad (\text{B.8})$$

$$w_j \in \{0, 1\} \quad j \in J \quad (\text{B.9})$$

$$d_{ijspe} \geq 0 \quad i \in I, j \in J, s \in S, p \in P, e \in \mathcal{P}(S) \quad (\text{B.10})$$

### Appendix C: Data used

| Borough       | Minimum | Maximum |
|---------------|---------|---------|
| Manhattan     | 70      | 100     |
| Staten Island | 14      | 21      |
| Brooklyn      | 65      | 75      |
| Queens        | 14      | 25      |
| Bronx         | 30      | 40      |

**Table C1** Yearly Lease Rate (\$) per sq. ft in Boroughs

| ID             | Borough Name  | NTA code | Yearly Cost (\$) |
|----------------|---------------|----------|------------------|
| 1              | Brooklyn      | BK82     | 5,000,000        |
| 2              | Queens        | QN49     | 2,450,000        |
| 3              | Queens        | QN01     | 3,000,000        |
| 4              | Queens        | QN18     | 2,700,000        |
| 5              | Staten Island | SI11     | 2,750,000        |
| 6              | Staten Island | SI24     | 2,600,000        |
| 7              | Brooklyn      | BK28     | 5,300,000        |
| 8              | Bronx         | BX13     | 3,600,000        |
| 9              | Staten Island | SI45     | 2,650,000        |
| 10             | Bronx         | BX06     | 3,550,000        |
| 11             | Staten Island | SI37     | 2,450,000        |
| 12             | Manhattan     | MN24     | 5,550,000        |
| 13             | Queens        | QN41     | 2,700,000        |
| 14             | Brooklyn      | BK31     | 5,000,000        |
| 15             | Queens        | QN53     | 3,000,000        |
| 16             | Manhattan     | MN11     | 6,100,000        |
| 17             | Brooklyn      | BK81     | 5,300,000        |
| 18             | Brooklyn      | BK42     | 5,250,000        |
| 19             | Brooklyn      | BK72     | 5,150,000        |
| 20             | Queens        | QN70     | 2,650,000        |
| <b>Average</b> |               |          | <b>3,837,500</b> |

**Table C2** Yearly facility Costs

| Parameters                                                                            | Estimated Value                                                                                                                                                                                                                   |
|---------------------------------------------------------------------------------------|-----------------------------------------------------------------------------------------------------------------------------------------------------------------------------------------------------------------------------------|
| Yearly demand of delivery by UAVs                                                     | $YD$                                                                                                                                                                                                                              |
| Avg hourly demand, $H$                                                                | $\frac{YD}{365 \times 14}$                                                                                                                                                                                                        |
| maximum hourly demand, $H^{max} = H \times 2.0$                                       | $\frac{YD}{365 \times 14} \times 2.0$                                                                                                                                                                                             |
| Nb. Of UAVs required, $NbUAVs = \frac{H^{max}}{2}$                                    | $\frac{YD}{365 \times 14} \times 2 \times \frac{1}{2}$                                                                                                                                                                            |
| Nb.of batteries required, $NbBatteries = NbUAVs$                                      | $\frac{YD}{365 \times 14} \times 2 \times \frac{1}{2}$                                                                                                                                                                            |
| Nb. Of UAVs per operator, $ND$                                                        | 10                                                                                                                                                                                                                                |
| Nb.of operators required per hour $NbOperators = \frac{H^{max}}{2 \times ND}$         | $\frac{YD}{365 \times 14} \times 2 \times \frac{1}{2} \times \frac{1}{10}$                                                                                                                                                        |
| Nb.of hours an operator works                                                         | 8                                                                                                                                                                                                                                 |
| Total Nb. of operators required, $TotalNbOperators = NbOperators \times \frac{14}{8}$ | $\frac{YD}{365 \times 14} \times 2 \times \frac{1}{2} \times \frac{1}{10} \times \frac{14}{8}$                                                                                                                                    |
| <b>Costs calculations</b>                                                             |                                                                                                                                                                                                                                   |
| Cost per UAV                                                                          | 3000                                                                                                                                                                                                                              |
| Cost per battery                                                                      | 200                                                                                                                                                                                                                               |
| Total battery cost, $BC = 200 \times NbBatteries$                                     | $\frac{YD}{365 \times 14} \times 2 \times \frac{1}{2} \times 200$                                                                                                                                                                 |
| Total UAV cost, $DC = 3000 \times NbUAVs$                                             | $\frac{YD}{365 \times 14} \times 2 \times \frac{1}{2} \times 3000$                                                                                                                                                                |
| Total purchasing cost, $PC = BC + DC$                                                 | $(3000 + 200) \times \frac{YD}{365 \times 14} \times 2 \times \frac{1}{2}$                                                                                                                                                        |
| Amortization rate, $r$                                                                | 20%                                                                                                                                                                                                                               |
| Yearly amortized cost of UAVs & Batteries, $AC = r \times PC$                         | $(3000 + 200) \times \frac{YD}{365 \times 14} \times 2 \times \frac{1}{2} \times 0.20$                                                                                                                                            |
| Yearly operators salary                                                               | 70,000                                                                                                                                                                                                                            |
| Total yearly operators salary cost, $OC = 70000 \times NbOperators$                   | $\frac{YD}{365 \times 14} \times 2 \times \frac{1}{2} \times \frac{1}{10} \times \frac{14}{8} \times 70000$                                                                                                                       |
| Total yearly costs, $TC = AC + OC$                                                    | $(3000 + 200) \times \frac{YD}{365 \times 14} \times 2 \times \frac{1}{2} \times 0.20 + \frac{YD}{365 \times 14} \times 2 \times \frac{1}{2} \times \frac{1}{10} \times \frac{14}{8} \times 70000$                                |
| Battery charging cost per delivery(in dollars)                                        | 0.10                                                                                                                                                                                                                              |
| <b>Cost per delivery, <math>\frac{TC}{YD}</math></b>                                  | $\left( \frac{(3000+200) \times \frac{YD}{365 \times 14} \times 2 \times \frac{1}{2} \times 0.20 + \frac{YD}{365 \times 14} \times 2 \times \frac{1}{2} \times \frac{1}{10} \times \frac{14}{8} \times 70000}{YD} \right) + 0.10$ |
|                                                                                       | $= 0.1252 + 2.397 + 0.10 \approx 2.62$                                                                                                                                                                                            |

**Table C3** Detailed calculations for UAV package delivery cost  $C_{ijn}$
